1 **Trophic transfer of microplastics enhances tissue accumulation of chemical**  
2 **additives in fish**

3 Takaaki Hasegawa<sup>a</sup>, Kaoruko Mizukawa<sup>b</sup>, Yeo Bee Geok<sup>b</sup>, Tomonori Sekioka<sup>c</sup>, Hideshige  
4 Takada<sup>b</sup>, Masahiro Nakaoka<sup>d,\*</sup>

5 <sup>a</sup>Graduate School of Environmental Science, Hokkaido University 060-0810, Hokkaido,  
6 Japan

7 <sup>b</sup>Laboratory of Organic Geochemistry, Tokyo University of Agriculture and Technology, 3-5-  
8 8, Saiwaicho, Fuchu, Tokyo 183-8538, Japan

9 <sup>c</sup>School of Fisheries Sciences, Hokkaido University 041-8611, Hokkaido, Japan

10 <sup>d</sup>Field Science Center for Northern Biosphere, Hokkaido University, 1 Aikappu, Akkeshi-cho,  
11 Akkeshi-gun, Hokkaido 088-1113, Japan

12

13

14 **\*Corresponding author:** nakaoka@fsc.hokudai.ac.jp

15 **Abstract**

16 A variety of chemical additives are incorporated into plastics during their production  
17 process to give desirable properties. Although studies have suggested that microplastic  
18 ingestion can lead to accumulation of these chemicals in marine organisms, none provided the  
19 direct evidence in fish species. Here, we demonstrated the tissue accumulation of chemical  
20 additives in fish following microplastic ingestion. We exposed fish (*Myoxocephalus brandti*)  
21 to polyethylene microplastics compounded with brominated flame retardants (BFRs; BDE209,  
22 DBDPE) and ultraviolet stabilizers (UVs; UV-234, UV-327, BP-12) suspended in the water  
23 column, or to mysids (*Neomysis* spp.) pre-exposed to the same microplastics. Our results  
24 showed a maximum of 345-fold higher concentrations of additives in fish exposed to  
25 microplastics than the ambient sample. Also, fish fed plastic-exposed mysids accumulated  
26 significantly greater concentrations of BFRs in muscle than fish exposed to microplastics  
27 suspended in the water column ( $p < 0.001$ ). This indicates that trophic transfer of microplastics  
28 has greater contribution to tissue accumulation of BFRs in fish than the waterborne ingestion.  
29 In contrast, no significant difference in the accumulation of UVs was found between the  
30 treatments, except for UV-327 in liver. These results suggests that the relative contribution  
31 between direct ingestion of microplastics from the water column and indirect ingestion via  
32 trophic transfer on tissue accumulation of additives in fish varies among compounds.  
33 Compounds with high molecular weight and high hydrophobicity like BDE209 and DBDPE  
34 were considered difficult to leach out from plastics, however, our study showed that trophic  
35 transfer of microplastics can facilitate the accumulation of such compounds from plastics to  
36 fish.

37

38 **Keywords:** Plastic ingestion, Brominated flame retardants, Ultraviolet stabilizers, *Neomysis*  
39 spp. *Myoxocephalus brandti*

40

41

## 42 **1. Introduction**

43 As plastic production has been increasing over the years, plastic debris have become  
44 ubiquitous pollutants found throughout marine environments (Auta et al., 2017; Burns and  
45 Boxall, 2018; Desforges et al., 2014; Duis and Coors, 2016). Especially, plastic particles  
46 smaller than 5 mm called microplastics are concerned as an emerging pollutant in marine  
47 ecosystems (NOAA, 2020). Their small size allows a variety of organisms to ingest such as  
48 whales, seabirds, fish, and invertebrates (Auta et al., 2017; Cole et al., 2013; Rummel et al.,  
49 2016; Zhang et al., 2019). Many studies have shown that ingesting microplastics can cause  
50 negative physical impacts on organisms such as blockage and laceration of the digestive tract  
51 (Derraik, 2002; Khosrovyan et al., 2012; Wright et al., 2013). In most cases, however, these  
52 negative effects were observed with unrealistically high exposure concentration in laboratory  
53 experiments (Cunningham and Sigwart, 2019; Lenz et al., 2016), and the current monitored  
54 concentration in the ocean is considered to have negligible impacts on organisms because  
55 microplastics can be egested from the body without long-term accumulation (Beiras and  
56 Schönemann, 2020; A. Dawson et al., 2018).

57 Aside from their physical effects, microplastics also have chemical effects on  
58 organisms. Plastics contain an array of chemicals that are either adsorbed to the polymer  
59 surface from the surrounding water or incorporated during the manufacturing process, the latter  
60 called plastic additives (Andrady, 2011; Cole et al., 2011; Ziccardi et al., 2016). These  
61 chemicals have been shown to transfer to biological tissues following the ingestion of  
62 microplastics and are concerned about their impacts on ecosystems because some of them have  
63 persistent and toxic natures (Hermabessiere et al., 2017a; Wardrop et al., 2016; Ziccardi et al.,  
64 2016). However, some model studies suggested that plastics are not important for the  
65 accumulation of these pollutants in organisms because their concentrations in plastics would

66 be at equilibrium with those in organisms and the chemical diffusion from plastics to organisms  
67 would not occur (Gouin et al., 2011; Koelmans et al., 2016). In contrast, microplastics may  
68 play a more relevant role in the transfer of chemical additives as they are added to plastic  
69 polymers at high concentrations (~80% by weight (Gangi, 1999)), whereas the information  
70 about the tissue accumulation of additives “compounded” in plastics is still far limited  
71 compared to that of adsorbed pollutants. A recent study by Tanaka et al. (2020) demonstrated  
72 that the ingestion of plastics resulted in the tissue accumulation of chemical additives in seabird.  
73 While no study has so far provided the direct evidence that microplastic ingestion can lead to  
74 the tissue accumulation of chemicals additives in fish species, Coffin et al. (2019) demonstrated  
75 that *in vivo* fish gut simulated condition using the digestive enzyme enhanced the leaching of  
76 additives from plastics, which suggests that tissue accumulation in fish species is plausible.  
77 Studies using fish species are especially important considering the food web structure of marine  
78 ecosystems and the potential impact on human health through direct consumption (Campanale  
79 et al., 2020; Huang et al., 2020).

80         There are two possible pathways for predatory fish to ingest microplastics, either from  
81 the water column or their prey (Walkinshaw et al., 2020). Most microplastic exposure studies  
82 focus either on waterborne or dietary exposure, but none of them compared their relative  
83 contribution to the total ingestion. Our prior work compared the waterborne ingestion of  
84 microplastics and the trophic transfer using fish and mysids, and revealed that the trophic  
85 transfer is more important than the waterborne ingestion (Hasegawa and Nakaoka, 2021). If  
86 microplastic ingestion by fish leads to tissue transfer of plastic-derived chemicals, fish may  
87 receive more impacts on the exposure of those chemicals via trophic transfer of microplastics  
88 than the waterborne exposure.

89         The present study aims to examine the tissue accumulation of chemical additives in  
90 fish following microplastic exposure and the relative contribution of the waterborne and trophic  
91 transfer exposure on the accumulation. We used a crustacean mysid (*Neomysis* spp.) and a

92 benthic fish (*Myoxocephalus brandti*) as a model prey-predator system that was also used in  
93 our prior work (Hasegawa and Nakaoka, 2021). We conducted the exposure experiments using  
94 polyethylene microplastics compounded with two brominated flame retardants (BFRs;  
95 BDE209, DBDPE) and three ultraviolet stabilizers (UVs; UV-234, UV327, BP-12). To  
96 examine the relative importance of the two exposure pathways, we exposed the fish to  
97 polyethylene microplastics suspended in the water column or to mysids pre-exposed to  
98 polyethylene microplastics, and analyzed the concentration of each additive in fish muscle and  
99 liver. We hypothesized that the fish would accumulate the additives following microplastic  
100 ingestion and that trophic transfer of microplastics would yield the greater accumulation of the  
101 additives than the waterborne ingestion.

102

## 103 **2. Materials & Methods**

### 104 **2.1 Animal collection and acclimation**

105 We collected organisms for the experiment on September 7, 2020 at a seagrass bed in  
106 Akkeshi-ko estuary (43°02' N, 144°52' E), which is located in eastern Hokkaido, northern  
107 Japan. Mysids (*Neomysis* spp., body length:  $7.70 \pm 1.53$  mm standard deviation, wet weight:  
108  $8.20 \pm 3.59$  mg standard deviation) and juvenile *M. brandti* (body length:  $7.40 \pm 0.52$  cm  
109 standard deviation, wet weight:  $4.35 \pm 0.81$  g standard deviation) were collected using an  
110 epibenthic sled. For the measurement of contaminant concentrations in the ambient  
111 environment, 90 mysids and three fish were immediately frozen and stored until the later  
112 chemical analysis, and the other fresh animals were brought to the laboratory for the  
113 experiments. Mysids were acclimated in 30-L aquaria overnight with flow-through seawater  
114 that were filtered by fine sand to allow them clear possible microplastics from their guts. Ten  
115 glass aquaria (245×165×160 mm) were prepared and one randomly selected fish was assigned  
116 to each aquarium, and then acclimated for 7 days prior to the start of the experiment. During

117 the acclimation, we daily fed the mysids microalgae (Shellfish diet 1800; Reed Mariculture)  
118 and the fish fresh mysids. Each aquarium contained approximately 100 mysids or 20 fish.

119

## 120 **2.2 Preparation of plastics with additives**

121 We used cylindrical low-density polyethylene pellets (diameter 5 mm, length 5 mm;  
122 DJK Corporation, Chiba, Japan) compounded with five plastic additives. Polyethylene is one  
123 of the most produced plastic polymers and is commonly found in marine environments  
124 (Andrady, 2011; Beiras et al., 2018; Burns and Boxall, 2018). Following five additives were  
125 industrially compounded in the polyethylene pellets: 1,2,3,4,5-pentabromo-6-(2,3,4,5,6-  
126 pentabromophenoxy)benzene (BDE209, CAS no. 1163-19-5), 1,2,3,4,5-pentabromo-6-[2-  
127 (2,3,4,5,6-pentabromophenyl)ethyl]benzene (DBDPE, CAS no. 84852-53-9), 2-(benzotriazol-  
128 2-yl)-4,6-bis(2-phenylpropan-2-yl)phenol (UV-234, CAS no.70321-86-7), 2,4-ditert-butyl-6-  
129 (5-chlorobenzotriazol-2-yl)phenol (UV-327, CAS no. 3864-99-1), and (2-hydroxy-4-  
130 octoxyphenyl)-phenylmethanone (BP-12, CAS no. 1843-05-6). BDE209 and DBDPE are  
131 widely used in plastic products and electrical appliances as flame retardants and are suspected  
132 to be non-readily degradable and have long-term toxicity (Hermabessiere et al., 2017b; NITE,  
133 2017). UV-234, UV-324 and BP-12 are also commonly added to plastic products as UV-  
134 stabilizers, which have the potential for bioaccumulation and toxicity on organisms (Kim et al.,  
135 2011; Nakata et al., 2009). These compounds were selected as previous studies reported their  
136 frequent occurrences in plastic debris collected in natural environments and marine organisms  
137 (Rani et al., 2015; Rochman et al., 2014; Tanaka et al., 2019). The concentration of each  
138 additive in the pellets was set below 0.04 % by weight, which is of the same order of magnitude  
139 as those observed in these studies. Polyethylene powder (Flo-Thene, FG701N, Sumitomo Seika  
140 Chemicals Co., Ltd., Osaka, Japan) and authentic standards of the additives in powder form  
141 (Wako Pure Chemical Industries, Ltd., Osaka, Japan) were mixed well and molded into pellets

142 in a co-rotating twin-screw kneading extruder (HK-25D; Parker Corporation, Inc., Tokyo,  
143 Japan). The pellets were then melted and re-extruded twice to obtain a uniform distribution of  
144 the constituents. The pellets were further grinded into powders by a plastic cutting mill (PLC-  
145 2M, Osaka Chemical Co., Ltd., Osaka, Japan) and the powders were sieved over a 63  $\mu\text{m}$  and  
146 32  $\mu\text{m}$  mesh. Particles left on the 32  $\mu\text{m}$  sieve were collected and used for the experiments.

147 For measurement of the particle size, the quantification method with Nile red was  
148 adapted from Erni-Cassola et al. (2017) using a nylon mesh filter with 8  $\mu\text{m}$  pore size. Particle  
149 area was measured, and the square root was calculated as particle size. The targeted  
150 polyethylene microplastics had an average size of  $29.90 \pm 13.40 \mu\text{m}$  and their size distribution  
151 is shown in Fig.1. The concentrations of five additives in polyethylene microplastics were  
152 quantified (Table 1) and the composition of each additive is shown in Fig. 2.

153 To prepare the microplastic-suspended solution, a glass beaker was filled with 100 mL  
154 of distilled water and boiled in a microwave. Ten microliters of surfactant (Tween 80;  
155 polyethylene sorbitol ester, Cospheric LLC) were added and stirred with a glass rod for 30 s.  
156 Next, 5 mL of the solution was transferred to another glass beaker filled with 95 mL of boiled  
157 distilled water to make 0.004 % surfactant solution. The solution was left at room temperature  
158 for 1 h. Before starting the exposure experiment, 8 mg of polyethylene microplastics were  
159 added to a plastic tube containing 8 mL of 0.004 % surfactant solution. The tube was vortexed  
160 and left at room temperature for 1 h to immerse into the solution. The suspension solution was  
161 prepared each time for the experiments to minimize the leaching of the chemicals from  
162 polyethylene microplastics during the immersion process.

163

### 164 **2.3 Leaching experiment**

165 To determine the amount of chemicals leaching from microplastics to seawater, three  
166 beakers filled with 1-L filtered seawater ( $< 1 \mu\text{m}$ ) were prepared. 250  $\mu\text{L}$  of suspension solution

167 (corresponds to 500- $\mu$ g microplastics) was added to each beaker and left for 24 h. We  
168 constantly circulated the seawater by aeration during the test. After 24 h, the seawater was  
169 transferred to a 1-L stainless container and stored in the freezer until the chemical analysis.

170

#### 171 **2.4 Ingestion experiment for mysids**

172 Thirty 1-L glass beakers were prepared and divided into the following two groups;  
173 fifteen bottles filled with 1-L filtered seawater ( $< 1 \mu\text{m}$ ) containing 500- $\mu\text{g/L}$  microplastics,  
174 and 15 bottles filled with 1-L leachate seawater. The microplastic concentration was chosen as  
175 an environmentally relevant concentration as it is within the same order of magnitude of the  
176 microplastic concentration reported in the North Pacific Subtropical Gyre, which is among the  
177 most heavily contaminated area around the world (Goldstein et al., 2012). Leachate seawater  
178 was prepared by filtering 1-L filtered seawater ( $< 1 \mu\text{m}$ ) containing 500- $\mu\text{g/L}$  microplastics to  
179 determine the uptake of the chemicals leaching from microplastics during the experiment by  
180 mysids. We randomly selected mysids from the acclimation aquaria and placed three in each  
181 bottle. We then fed the mysids 2 mg (dry weight) of microalgae. We constantly circulated the  
182 seawater by aeration to ensure that the microplastics were evenly distributed in the bottles.  
183 After 24 h of microplastic exposure, the mysids were flushed gently with filtered seawater to  
184 remove beads from the exoskeleton and their body length and wet weight were measured. Then,  
185 the mysids were frozen at  $-30^{\circ}\text{C}$  and stored until the later analysis. The same procedure was  
186 repeated 4 days to collect 150 mysids in total from each group except that only 15 mysids in  
187 each group were used at 4th day.

188

#### 189 **2.5 Trophic transfer experiment**

190 After the acclimation for fish, ten fish aquaria were divided into the following two  
191 groups: Five aquaria contained 2-L filtered seawater ( $< 1 \mu\text{m}$ ) with a 500- $\mu\text{g/L}$  microplastic



192 suspension and nine plastic-free mysids each, so that the fish would ingest polyethylene  
193 microplastics only from the water column. Five other aquaria each contained nine mysids that  
194 had been pre-exposed to 500- $\mu\text{g/L}$  microplastics. The five aquaria containing pre-exposed  
195 mysids were filled with 2-L filtered seawater (1  $\mu\text{m}$ ) without a microplastic suspension so that  
196 uptake of polyethylene microplastics would be solely from the food source. The number of  
197 mysids was determined from a preliminary experiment to ensure that all mysids were consumed  
198 by the fish within 24 h. Pre-exposure of the mysids followed the protocol for the first  
199 experiment. We carried out the exposure for 10 days and exchanged the seawater once a day.  
200 We constantly circulated the seawater by aeration throughout the experiment to ensure that  
201 microplastics were evenly distributed in the aquaria. We did not observe any microplastics on  
202 the bottom of the tanks throughout the experiment. After 10 days of exposure, the fish were  
203 gently flushed with filtered seawater to remove beads from the body surface. Following  
204 measurement of their body length and wet weight, the fish were frozen at  $-30^{\circ}\text{C}$  and stored  
205 until the later analysis.

206

## 207 **2.6 Sample analysis**

### 208 **2.6.1 Chemical and reagents**

209 Acetone, n-hexane, 2,2,4-trimethylpentane (iso-octane), methanol (MeOH), pyridine,  
210 acetic anhydride, hydrochloric acid, anhydrous sodium sulfate, Wakogel Q-22 (75  $\mu\text{m}$ , 200  
211 mesh) and Wakogel Q-23 (75-150  $\mu\text{m}$ , 100–200 mesh) were purchased from Wako Pure  
212 Chemical Ltd. (Osaka, Japan). Dichloromethane (DCM) were purchased from Kanto Chemical  
213 Co., Inc. (Tokyo, Japan). Analytical standards for BDE209 and DBDPE were purchased from  
214 Wellington Laboratories Inc. (Guelph, Ontario, Canada). Hexa-nona BDE individual congeners  
215 were obtained from Wellington Laboratories Inc. (BDE179, 183, 188 and 202), Cambridge  
216 Isotope Laboratories Inc. (BDE207; Tewksbury, MA, US) and Accustandard Inc. (BDE155,  
217 184, 196, 197, 203, 206 and 208; New Haven, CT, US) respectively. UV327 and BP12 were

218 also obtained from Accustandard Inc. Analytical surrogates were used the followings; f-  
219 BDE208 (4'-fluoro-2,2',3,3',4,5,5',6,6'-nonabromo-diphenylether) from Chiron AS  
220 (Trondheim, Norway) for BFRs, UV327-d20 were from Toronto Research Chemicals, Inc.  
221 (North York, ON Canada) for UV327 and UV234 and BP12-d17 were from Hayashi Pure  
222 Chemical Ind., Ltd. (Osaka, Japan) for BP12. As internal injection standard (IIS), chrysene-  
223 d12 was purchased from Sigma–Aldrich (St. Louis, MO, USA). All glassware was rinsed with  
224 methanol, acetone, and distilled n-hexane three times respectively or pre-baked at 550 °C for 4  
225 hours.

226

## 227 **2.6.2 Biological samples**

228 For chemical analysis, the liver and whole-body (mainly muscle tissues, excluding the  
229 intestines, head and fins) were used. Each freeze-dried sample was extracted by accelerated  
230 solvent extractor (ASE200; Dionex, Sunnyvale, CA, USA) with acetone/DCM (1:3, v/v). The  
231 samples were extracted in 11 mL stainless steel cells under the following conditions: preheat  
232 time, 0 min; heat time, 5 min; static time, 5 min; flush%, 100%; purge, 60 s; 2 cycles; pressure,  
233 1500 psi; temperature, 100 °C.

234 To determine lipid contents of whole-body sample from the weight of the dried  
235 extracts, aliquot of the extract was taken into another weighed-4 mL vial. After injection the  
236 surrogates (f-BDE208, UV327-d20 and BP12-d17) into another aliquot, it was concentrated  
237 just to dryness in a rotary evaporator and transferred into a 10 mL centrifugation tube. After  
238 reducing the solvent less than 100 mL by gentle nitrogen stream, we added 50 mL each of  
239 pyridine and acetic anhydride into each tube. After holding at room temperature for >8 h, the  
240 reaction was stopped with the addition of 200 mL 4 M HCl. Acetylates were extracted with n-  
241 hexane 5 times. The n-hexane extract was passed through anhydrous sodium sulfate for  
242 dehydration and collected into pair-shaped flask.

243 After a solvent substitution from n-hexane to DCM, the acetylated sample was purified  
244 by gel permeation chromatography (GPC). About 2 mL of sample was subjected to GPC (2 cm  
245 i.d. ×30 cm, CLNpak EV-2000; Showa-denko, Tokyo, Japan) to separate target compounds  
246 from biolipids in DCM at an eluent at flow rate of 4 mL/min. The fraction with a retention time  
247 of 12 to 25 min was collected for further purification.

248 The GPC eluent was concentrated just to dryness in a rotary evaporator and placed in  
249 a 10% H<sub>2</sub>O-deactivated silica gel column (Wakogel Q-22, 1 cm i.d. × 9 cm). The first fraction  
250 including BFRs was eluted with 35 mL n-hexane/DCM (3:1, v/v). The second and third fraction  
251 including UVs were eluted with 15 mL MeOH/DCM (1:99, v/v) and 20 mL (1%  
252 MeOH/DCM)/Acetone (1:4, v/v) respectively. The second and third fraction were combined  
253 and evaporated the solvents and transferred into a 1 mL amber ampoule for instrumental  
254 analysis.

255 The first eluent containing BFRs was concentrated just to dryness in a rotary  
256 evaporator and placed in a fully activated silica gel column (Wakogel Q-23, 0.47 cm i.d. ×18  
257 cm). The first fraction, containing aliphatic hydrocarbons, was eluted with 5 mL n-hexane. The  
258 second fraction, containing BFRs was eluted with 15 mL n-hexane/DCM (85:15, v/v) or 10 mL  
259 n-hexane/DCM (3:1, v/v). The BFR fraction was concentrated and transferred into a 1 mL  
260 amber ampoule for instrumental analyses.

261

### 262 **2.6.3 Water samples**

263 To analyze the water samples from the leaching experiment, the water was filtered  
264 through a glass fiber filter (GF/F), and f-BDE208, UV327-d20, and BP12-d17 dissolved in  
265 acetone were added to the filtrate as surrogates. Then, liquid-liquid extraction was carried out  
266 with dichloromethane (DCM) at 10% of the volume of the water sample, and the organic phase  
267 was collected while dehydrating with anhydrous sodium sulfate. This process was repeated

268 three times. The extracts were concentrated using a rotary evaporator and fractionated and  
269 purified using acetylation and 10 % water-inactivated silica gel column chromatography  
270 (Wakogel Q-22) as with the biological samples.

271

#### 272 **2.6.4 Instrumental analysis**

273 For analysis of BFRs, the solvent was evaporated just to dryness under a nitrogen  
274 stream, and the residue was redissolved in 100 mL iso-octane.

275 UVs were analyzed on a 5977 quadrupole mass spectrometer fitted with a 7890 gas  
276 chromatograph (GC-MS; Agilent technologies, Inc., Santa Clara, CA, US). An Agilent HP-  
277 5MS 30-m fused silica capillary column (0.25 mm i.d., 0.25 mm film thickness) was used with  
278 helium as the carrier gas at 100 kPa. GC-MS operating conditions were set at 70 eV ionization  
279 potential with the source at 240 °C and the electron multiplier voltage at ~2000 eV. The  
280 injection port was maintained at 300 °C, and the sample was injected in splitless mode, then  
281 purged 2 min after injection. The column temperature was held at 100 °C for 1 min, rose at  
282 30 °C/min to 160 °C, at 10 °C/min to 310 °C and was then held for 10 min. After a solvent  
283 delay of 4 min, selected ion monitoring mode was used. We monitored UV327 at  $m/z = 342$   
284 UV234 at 432, BP-12 at 213. Surrogate standards and IIS were monitored at  $m/z = 359$   
285 (UV327-d20),  $m/z = 343$  (BP12-d17), at  $m/z = 240$  (chrysene-d12) respectively. These were  
286 quantified by comparing the integrated peak area of the quantification ion with that of the IIS  
287 as derived from calibration lines drawn for individual UVs.

288 BFRs were determined by a micro electron capture detector fitted with a HP 7890 gas  
289 chromatograph (GC-mECD, Agilent Technologies Inc.). An Agilent DB-5 15-m fused silica  
290 capillary column (0.25 mm i.d., 0.25 mm film thickness) was used with helium as the carrier  
291 gas. To separate BDE208 and f-BDE208 clearly and gain higher peaks of BDE209 and DBDPE,  
292 we used ramped pressure mode for the analysis. The column pressure was held at 20.19 psi for

293 31 min, rose at 15 psi/min to 35 psi, and was then held for 6 min. The injection port was  
294 maintained at 250 °C, and the sample was injected in splitless mode, then purged 0.75 min after  
295 injection. The column temperature was held at 80 °C for 2 min, rose at 30 °C/min to 240 °C, at  
296 3 °C/min to 300 °C and was then held for 15 min. BFRs were identified and quantified against  
297 the standards.

298

### 299 **2.6.5 Analytical quality control and quality assurance**

300 A procedural blank was run in every set analyzed. Analytical values less than three  
301 times of the corresponding blank are expressed as “below the limit of quantification”, <LOQ.  
302 To certificate analytical quality control and quality assurance, quadruplicate mussel samples  
303 which were spiked the standard solution of target compounds were analyzed. The relative  
304 standard deviations of the concentrations of BDE209, DBDPE, UV327, UV234 and BP12 were  
305 2%, 2%, 2%, 10% and 12% respectively. The averaged recoveries of BDE209, DBDPE,  
306 UV327, UV234, and BP12 were 90%, 114%, 92%, 100%, and 83% respectively.

307

### 308 **2.7 Statistical Analysis**

309 All analysis were conducted in R (R Core Team, 2020). To compare the differences in  
310 additive accumulation by mysids, fish muscle, and fish liver among treatments, we used  
311 generalized linear models (GLMs) with log link functions. A gamma distribution was assumed  
312 to account for the positive continuous values because the Shapiro-Wilk normality tests showed  
313 that the response variable had a non-normal distribution. We used log-transformed sample dry  
314 weight as an offset in the models. To test the effect of treatment, we performed a likelihood  
315 ratio test using the Anova function in the “car” package (Fox and Weisberg, 2019). For pairwise  
316 comparisons, we used Tukey’s HSD test as post-hoc analysis.

317

### 318 **3. Results**

#### 319 **3.1 Leaching experiment**

320 Overall, 2.33% of the amount of additives were leached out from polyethylene  
321 microplastics for 24 h. The leaching rate varied among different additives (Table 2) with the  
322 mean of 3.16 %. BP-12 showed the higher leaching rate (8.79 %) than other additives (<3 %).

323

#### 324 **3.2 Ingestion experiment for mysids**

325 Concentration of five additives accumulated in mysids significantly differed among  
326 treatments (Table 3). Mysids contained approximately 4-2450 times higher concentrations of  
327 additives by ingesting microplastics than those from the ambient environment (Fig. 3). Mysids  
328 treated with the leachate seawater also showed slightly elevated concentrations of additives  
329 than those from the ambient environment. For BP-12, the concentration in mysids treated with  
330 the leachate seawater was not significantly different from those exposed to microplastics.

331

#### 332 **3.3 Trophic transfer experiment**

333 Concentration of the five additives in fish varied significantly among treatments  
334 (Table 5) although the patterns of variation greatly differed among additives and between body  
335 tissues (Fig. 4).

336 For BFRs, the treatment had significant effects on their concentrations both in muscle  
337 and liver. In muscle, fish fed plastic-exposed mysids showed the higher concentrations than  
338 those exposed to microplastics suspended in the water column. The mean effect was greater in  
339 BDE209 (71-fold on dry weight basis, 161-fold on lipid weight basis) than DBDPE (22-fold  
340 on dry weight basis, 52-fold on lipid weight basis). Although the lipid weight basis analysis  
341 showed the significantly higher concentration in the water treatment than the ambient control,  
342 no significant differences were observed between them on dry weight basis. Notably, the

343 within-treatment variation in the mysid treatment was also greater than the other two treatments.  
344 In contrast, liver showed no significant difference in the concentration of BDE209 between the  
345 mysid and water treatments although they were more than 3 fold greater than the ambient  
346 control. The same patterns of significant variation was also found for DBDPE except that the  
347 concentration in liver in the mysid treatment was not different from the ambient controls. Liver  
348 showed different accumulation patterns of BFRs between the treatments. In the water treatment,  
349 the mean concentrations were higher in liver (BDE209: 5.83 ng/g-dry, DBDPE: 9.79 ng/g-dry)  
350 than muscle (BDE209: 0.47 ng/g-dry, DBDPE: 0.60 ng/g-dry) while the mysid treatment  
351 showed the lower concentrations in liver (BDE209: 3.99 ng/g-dry, DBDPE: 2.52 ng/g-dry) than  
352 muscle (BDE209: 4.30 ng/g-dry, DBDPE: 5.67 ng/g-dry).

353 For UVs, the treatment had significant effects on their concentration except for UV-  
354 234 in muscle where no treatment effect was observed. In muscle, UV-327 and BP-12 showed  
355 3-5 fold higher concentrations in the treatment groups than the ambient control (7-12 fold on  
356 lipid weight basis). Unlike BDE209 and DBDPE, however, no significant differences were  
357 found between the mysid and water treatments. In liver, UV-234 and UV-327 respectively  
358 showed 9-13 fold and 35-89 fold higher concentration in the treatment groups than the ambient  
359 controls, and also the concentration of UV-327 in the mysid treatment was significantly higher  
360 than that in the water treatment. While BP-12 showed 3-fold higher concentration in the mysid  
361 treatment than the ambient control, the concentration in the water treatment was not  
362 significantly different from both the mysid treatment and the ambient control. In general, liver  
363 showed the higher concentrations of UVs in liver than muscle in both treatments, whereas the  
364 accumulation tendency between the tissues greatly differed among the chemicals. For example,  
365 UV-234 showed the greatest increase in liver compared to muscle among UVs (Water: 29-fold,  
366 Mysid: 53-fold), whereas BP-12 only showed 7-fold increase in the water treatment and 13-  
367 fold increase in the mysid treatment.

368

369 **4. Discussion**

370 This study provides the first evidence that microplastic ingestion leads to the tissue  
371 accumulation of chemical additives in fish. We also revealed that trophic transfer of  
372 microplastics enhanced the accumulation of BFRs in fish muscle compared to the waterborne  
373 ingestion. However, as we observed the equal contribution to the accumulation of UVs between  
374 direct ingestion of microplastics from the water column and indirect ingestion via trophic  
375 transfer, their relative contribution varies among additives.

376 Previous studies showed that microplastics can act as a vector for the transfer of  
377 plastic-associated chemicals to marine organisms, but mostly targeted at the environmental  
378 contaminants adsorbed onto plastics, such as PCBs and PAHs (Besseling et al., 2013; Rochman  
379 et al., 2013). However, some model prediction studies pointed out that microplastics would not  
380 increase the body burden of these contaminants in organisms because other input sources like  
381 water and food would play a more important role in their accumulation (Bakir et al., 2016;  
382 Gouin et al., 2011; Koelmans et al., 2016). In contrast, plastic additives are different from  
383 pollutants adsorbed to plastics with respect that they are not attached to the polymer surface,  
384 but incorporated into plastics at high concentrations (Gangi, 1999). Several field observation  
385 studies found a positive relationship between plastic ingestion and chemical additives detected  
386 from marine fish and seabirds (Gassel et al., 2013; Tanaka et al., 2013), suggesting the potential  
387 occurrence of the tissue transfer of plastic-derived additives in natural environments. Our  
388 results support these evidence along with the previous finding by Tanaka et al. (2020) where  
389 they demonstrated that plastic ingestion led to the tissue accumulation of additives in seabird  
390 (*Calonectris leucomelas*) by the laboratory experiment. Gut fluid in both seabird and fish have  
391 been shown to play a key role in the leaching of chemicals from plastics (Coffin et al., 2019;  
392 Tanaka et al., 2015), which explains the tissue accumulation of chemical additives following  
393 plastic ingestion. Given the generality of plastic ingestion in fish and detection of additives in



394 plastics found in natural environments (Granek et al., 2020; Wang et al., 2020), our study raises  
395 a concern about the exposure of these additives to fish.

396 We found that trophic transfer of microplastics has greater effects on the accumulation  
397 of BDE209 and DBDPE in fish than waterborne ingestion. There are three possible  
398 explanations for this result which are not exclusive. First, fish was exposed to more chemical  
399 additives by ingesting microplastics via trophic transfer. Our previous study demonstrated that  
400 fish ingested greater amount of microplastics via trophic transfer than the waterborne ingestion  
401 (Hasegawa and Nakaoka, 2021). Higher ingestion rate of microplastics via trophic transfer  
402 should have resulted in the greater exposure intensity of chemical additives in fish stomach.  
403 Secondly, greater secretion of gut fluid may have elevated the leaching rate of additives from  
404 plastics in stomach. Gut fluid plays a key role in leaching hydrophobic chemicals from ingested  
405 plastics (Coffin et al., 2019; Tanaka et al., 2015). Digesting plastic-contaminated prey could  
406 facilitated the secretion of gut fluid in stomach, which may have enhanced the leaching of  
407 chemicals from plastics. Thirdly, mysids fragmented microplastics into smaller particles and  
408 helped the release of chemicals from plastics. Some crustacean species can fragment plastics  
409 into smaller particles, including mysids (A. L. Dawson et al., 2018; Hasegawa and Nakaoka,  
410 2021; Mateos-Cárdenas et al., 2020). Generally, smaller plastics can release chemicals more  
411 easily due to their larger surface-to-volume ratio (Wright and Kelly, 2017). Ingesting  
412 microplastics from mysids, therefore, changed the size composition of plastics in fish stomach,  
413 and may have enhanced the leaching of chemicals. Compounds with high molecular weight  
414 and high hydrophobicity such as BDE209 and DBDPE (Table 1) were considered difficult to  
415 leach out from plastics and to transfer into biological tissues (Brækevelt et al., 2003; Cheng et  
416 al., 2020; Sun et al., 2019). However, we demonstrated the elevated accumulation of these  
417 compounds in the fish by ingesting microplastics from mysids. Thus, our study highlights the  
418 importance of indirect exposure via trophic transfer in chemical effects of microplastics on  
419 organisms.

420           Although we observed the greater accumulation of BDE209 and DBDPE via trophic  
421 transfer of microplastics, the waterborne exposure equally contributed the accumulation of UV-  
422 327, UV-234 and BP-12. This suggests that the trend in accumulation of chemical additives  
423 vary depending both on the properties of the chemicals and on exposure pathway. Given the  
424 ingestion of microplastics from the water column in fish are much lower than the trophic  
425 transfer (Hasegawa and Nakaoka, 2021), there could be other accumulation routes in the  
426 waterborne exposure of chemical additives. In marine fish, there are three possible routes for  
427 chemical uptake from the environment: gill uptake, dermal absorption and gut absorption by  
428 drinking water (Qiao et al., 2000). Although microplastic ingestion is assumed to only  
429 contribute to gut absorption, gill uptake could also be important because microplastics can also  
430 accumulate in gill. Water flux in the gill of marine benthic fish *Oligocottus maculosus*, which  
431 shares the same family of our target fish *M. brandti*, by ventilation is 300-fold higher than that  
432 in stomach by drinking water (Somo et al., 2020; Webb et al., 2001). Also, UV-234, UV-324  
433 and BP-12 are likely to leach out from plastics more easily than BDE209 and DBDPE due to  
434 their lower molecular weight and less hydrophobic nature (Table 1). Considering the more  
435 frequent contact with microplastics and the lower hydrophobic nature, gill may have also  
436 played a role in the transfer of the UVs into fish body. Given that mysids accumulated additives  
437 leached out from plastics to the water column, fish was also likely to accumulate the additives  
438 from the water column in the same manner, especially for BP-12 that showed the higher  
439 leaching rate (10%) and the higher accumulation in mysids. Although we need further  
440 investigation on the mechanism that differentiates the behavior of additives depending on each  
441 exposure pathway, both waterborne exposure and trophic transfer of microplastics are  
442 important for the accumulation of plastic additives in fish.

443           Overall, we observed the preferential accumulation of the chemicals in liver over  
444 muscle, which is consistent with the previous findings targeted at the same class of compounds  
445 (Nakata et al. 2009; Tanaka et al. 2020). However, the effect size was much smaller in BFRs

446 (0.4-16 fold) than UVs (7-53 fold). Tanaka et al. (2020) observed the totally opposite trend in  
447 seabird that showed the considerably high level of accumulation for BDE209, but less for UV-  
448 327 and BP-12 in the liver. This indicates the species-specific accumulation patterns even in  
449 the same compounds. Tanaka et al. (2020) explained the lower accumulation of BP-12 by the  
450 degradation in liver due to the susceptible nature of BP-12 to the metabolization. In contrast,  
451 BDE209 is known to be resilient to biodegradation because of their high molecular weight. As  
452 several studies showed that BDE209 and DBDPE can be readily metabolized to lower  
453 brominated congeners in fish species (Chen et al., 2012; X. Wang et al., 2019), lower  
454 accumulation level for these two compounds could be explained by the metabolization. Still,  
455 we cannot fully exclude this possibility without conducting a depuration experiment to examine  
456 *in vivo* kinetics of these chemicals. Future studies should investigate the temporal variation of  
457 chemical concentrations in different tissues to understand the fate of plastic additives in  
458 organisms.

459         Studies have demonstrated that both BFRs and UVs have negative impacts on  
460 organisms (Kim et al., 2011; Morohoshi et al., 2005; X. Wang et al., 2019). Especially,  
461 extensive research have been conducted for BDE209 and have shown that the compound can  
462 act as an endocrine disrupter and cause neurotoxicity on fish (Sun et al., 2020; X. Wang et al.,  
463 2019; Y. Wang et al., 2019). BDE209 is also concerned for the accumulation in a human body  
464 because of the potential adverse health effects (Darnerud, 2008). As global seafood  
465 consumption has been increasing over the years, humans may be more frequently exposed to  
466 such additives through seafood consumption. A simple risk assessment of plastic additives on  
467 humans through consumptions of fish can be made as follows. First, BDE209 accumulation in  
468 fish, dairy intake of BDE209 through seafood consumption was estimated based on the result  
469 of BDE209 concentration in fish muscle. Assuming annual seafood consumption of 24.6 kg  
470 year<sup>-1</sup> and the average body weight of 60 kg for adult Japanese (Ministry of Agriculture, 2016;  
471 Ministry of Health, 2018) and using our observed data on the mean BDE209 concentration of

472 4.70 ng/g.wet weight in fish muscle considering the both microplastic exposure pathways, dairy  
473 intake of BDE209 can be estimated as 0.46 ng/kg/day. According to the report from National  
474 Institute of Technology and Evaluation, lowest observed adverse effects levels (LOAEL) of  
475 BDE209 is estimated as 50 ng/kg/day to induce chronic toxicity for a human (NITE, 2017),  
476 which is approximately 110-fold higher than the estimated dairy intake value through seafood  
477 consumption. As our study used the environmentally relevant concentration of additives,  
478 accumulation of plastic additives in fish through microplastic exposure should be negligible  
479 for a human body in the current plastic pollution level of the world's ocean. However, current  
480 study only shows the marginal results with 10-day microplastic exposure to fish. Considering  
481 a long-term exposure of microplastics to fish throughout the life, fish would accumulate far  
482 more plastic-derived additives. A study predicted the abundance of plastics in the ocean would  
483 increase 50-fold by 2100 from the present condition (Everaert et al., 2018), suggesting that  
484 plastic exposure through seafood consumption would provide a relevant pathway for BDE209  
485 to have adverse health effects on a human in the future scenario. We are also being exposed to  
486 these additives from the daily use of plastic products. The risk assessment study estimated a  
487 daily exposure amount of BDE209 to humans from different exposure routes such as inhalation  
488 of inside dusts or elution from plastic products, but did not include the exposure through  
489 seafood consumption (NITE, 2017). This study clearly showed the chemical accumulation in  
490 fish following microplastic exposure. Thus, these risk assessment studies should consider  
491 seafood consumption as a factor for the exposure of plastic-derived chemicals to a human body.

492

### 493 **Conclusion**

494 This study is the first to demonstrate that microplastic ingestion can lead to tissue  
495 accumulation of chemical additives in fish. We also revealed that indirect exposure of  
496 microplastics via trophic transfer can enhance the accumulation of BDE209 and DBDPE that  
497 were assumed difficult to accumulate in organisms because of their low leachability from

498 plastics. Some studies have suggested that microplastics themselves do not accumulate in the  
499 body and have negligible effects on organisms because they can be excreted from the body.  
500 Whereas, our findings indicate that microplastics play an important role in chemical  
501 bioaccumulation. As many chemical additives are potentially toxic, this study raises the  
502 concern about their negative impacts on marine ecosystems. To better understand the fates and  
503 the effects of chemical additives accumulated in organisms, further research should examine  
504 their *in vivo* kinetics and toxicity.

505

## 506 **References**

- 507 Andradý, A.L., 2011. Microplastics in the marine environment. *Mar. Pollut. Bull.* 62, 1596–  
508 1605. <https://doi.org/10.1016/j.marpolbul.2011.05.030>
- 509 Auta, H.S., Emenike, C.U., Fauziah, S.H., 2017. Distribution and importance of microplastics  
510 in the marine environment: A review of the sources, fate, effects, and potential solutions.  
511 *Environ. Int.* 102, 165–176. <https://doi.org/10.1016/j.envint.2017.02.013>
- 512 Bakir, A., O’Connor, I.A., Rowland, S.J., Hendriks, A.J., Thompson, R.C., 2016. Relative  
513 importance of microplastics as a pathway for the transfer of hydrophobic organic  
514 chemicals to marine life. *Environ. Pollut.* 219, 56–65.  
515 <https://doi.org/10.1016/j.envpol.2016.09.046>
- 516 Beiras, R., Bellas, J., Cachot, J., Cormier, B., Cousin, X., Engwall, M., Gambardella, C.,  
517 Garaventa, F., Keiter, S., Le Bihanic, F., López-Ibáñez, S., Piazza, V., Rial, D., Tato, T.,  
518 Vidal-Liñán, L., 2018. Ingestion and contact with polyethylene microplastics does not  
519 cause acute toxicity on marine zooplankton. *J. Hazard. Mater.* 360, 452–460.  
520 <https://doi.org/10.1016/j.jhazmat.2018.07.101>
- 521 Beiras, R., Schönemann, A.M., 2020. Currently monitored microplastics pose negligible  
522 ecological risk to the global ocean. *Sci. Rep.* 10, 1–9. [https://doi.org/10.1038/s41598-](https://doi.org/10.1038/s41598-020-79304-z)  
523 [020-79304-z](https://doi.org/10.1038/s41598-020-79304-z)

- 524 Besseling, E., Wegner, A., Foekema, E.M., Van Den Heuvel-Greve, M.J., Koelmans, A.A.,  
525 2013. Effects of microplastic on fitness and PCB bioaccumulation by the lugworm  
526 *Arenicola marina* (L.). Environ. Sci. Technol. 47, 593–600.  
527 <https://doi.org/10.1021/es302763x>
- 528 Braekevelt, E., Tittlemier, S.A., Tomy, G.T., 2003. Direct measurement of octanol-water  
529 partition coefficients of some environmentally relevant brominated diphenyl ether  
530 congeners. Chemosphere 51, 563–567. [https://doi.org/10.1016/S0045-6535\(02\)00841-X](https://doi.org/10.1016/S0045-6535(02)00841-X)
- 531 Burns, E.E., Boxall, A.B.A., 2018. Microplastics in the aquatic environment: Evidence for or  
532 against adverse impacts and major knowledge gaps. Environ. Toxicol. Chem. 37, 2776–  
533 2796. <https://doi.org/10.1002/etc.4268>
- 534 Campanale, C., Massarelli, C., Savino, I., Locaputo, V., 2020. A detailed review study on  
535 potential effects of microplastics and additives of concern on human health.
- 536 Chen, Q., Yu, L., Yang, L., Zhou, B., 2012. Bioconcentration and metabolism of  
537 decabromodiphenyl ether ( BDE-209 ) result in thyroid endocrine disruption in zebrafish  
538 larvae. Aquat. Toxicol. 110–111, 141–148.  
539 <https://doi.org/10.1016/j.aquatox.2012.01.008>
- 540 Cheng, H., Luo, H., Hu, Y., Tao, S., 2020. Release kinetics as a key linkage between the  
541 occurrence of flame retardants in microplastics and their risk to the environment and  
542 ecosystem : A critical review. Water Res. 185, 116253.  
543 <https://doi.org/10.1016/j.watres.2020.116253>
- 544 Coffin, S., Huang, G.Y., Lee, I., Schlenk, D., 2019. Fish and seabird gut conditions enhance  
545 desorption of estrogenic chemicals from commonly-ingested plastic items. Environ. Sci.  
546 Technol. 53, 4588–4599. <https://doi.org/10.1021/acs.est.8b07140>
- 547 Cole, M., Lindeque, P., Fileman, E., Halsband, C., Goodhead, R., Moger, J., Galloway, T.S.,  
548 2013. Microplastic ingestion by zooplankton. Environ. Sci. Technol. 47, 6646–6655.  
549 <https://doi.org/10.1021/es400663f>

- 550 Cole, M., Lindeque, P., Halsband, C., Galloway, T.S., 2011. Microplastics as contaminants in  
551 the marine environment: A review. *Mar. Pollut. Bull.* 62, 2588–2597.  
552 <https://doi.org/10.1016/j.marpolbul.2011.09.025>
- 553 Cunningham, E.M., Sigwart, J.D., 2019. Environmentally accurate microplastic levels and  
554 their absence from exposure studies. *Integr. Comp. Biol.* 59, 1485–1496.  
555 <https://doi.org/10.1093/icb/icz068>
- 556 Darnerud, P.O., 2008. Brominated flame retardants as possible endocrine disruptors 152–160.  
557 <https://doi.org/10.1111/j.1365-2605.2008.00869.x>
- 558 Dawson, A., Huston, W., Kawaguchi, S., King, C., Cropp, R., Wild, S., Eisenmann, P.,  
559 Townsend, K., Bengtson Nash, S.M., 2018. Uptake and depuration kinetics influence  
560 microplastic bioaccumulation and toxicity in antarctic krill (*Euphausia superba*).  
561 *Environ. Sci. Technol.* 52, 3195–3201. <https://doi.org/10.1021/acs.est.7b05759>
- 562 Dawson, A.L., Kawaguchi, S., King, C.K., Townsend, K.A., King, R., Huston, W.M.,  
563 Bengtson Nash, S.M., 2018. Turning microplastics into nanoplastics through digestive  
564 fragmentation by Antarctic krill. *Nat. Commun.* 9, 1–8. [https://doi.org/10.1038/s41467-](https://doi.org/10.1038/s41467-018-03465-9)  
565 [018-03465-9](https://doi.org/10.1038/s41467-018-03465-9)
- 566 Derraik, J.G.B., 2002. The pollution of the marine environment by plastic debris: A review.  
567 *Mar. Pollut. Bull.* 44, 842–852. [https://doi.org/10.1016/S0025-326X\(02\)00220-5](https://doi.org/10.1016/S0025-326X(02)00220-5)
- 568 Desforges, J.P.W., Galbraith, M., Dangerfield, N., Ross, P.S., 2014. Widespread distribution  
569 of microplastics in subsurface seawater in the NE Pacific Ocean. *Mar. Pollut. Bull.* 79,  
570 94–99. <https://doi.org/10.1016/j.marpolbul.2013.12.035>
- 571 Duis, K., Coors, A., 2016. Microplastics in the aquatic and terrestrial environment: sources  
572 (with a specific focus on personal care products), fate and effects. *Environ. Sci. Eur.* 28,  
573 1–25. <https://doi.org/10.1186/s12302-015-0069-y>
- 574 Erni-Cassola, G., Gibson, M.I., Thompson, R.C., Christie-Oleza, J.A., 2017. Lost, but found  
575 with Nile red: A novel method for detecting and quantifying small microplastics (1 mm

- 576 to 20 µm) in environmental samples. *Environ. Sci. Technol.* 51, 13641–13648.  
577 <https://doi.org/10.1021/acs.est.7b04512>
- 578 Everaert, G., Van Cauwenberghe, L., De Rijcke, M., Koelmans, A.A., Mees, J.,  
579 Vandegehuchte, M., Janssen, C.R., 2018. Risk assessment of microplastics in the ocean:  
580 Modelling approach and first conclusions. *Environ. Pollut.* 242, 1930–1938.  
581 <https://doi.org/10.1016/j.envpol.2018.07.069>
- 582 Fox, J., Weisberg, S., 2019. *An {R} Companion to Applied Regression*, Third. ed. Sage,  
583 Thousand Oaks {CA}.
- 584 Gangi, J. Di, 1999. Phthalates in PVC medical products from 12 countries. Greenpeace,  
585 Washington, DC.
- 586 Gassel, M., Harwani, S., Park, J., Jahn, A., 2013. Detection of nonylphenol and persistent  
587 organic pollutants in fish from the North Pacific Central Gyre. *Mar. Pollut. Bull.* 73,  
588 231–242. <https://doi.org/10.1016/j.marpolbul.2013.05.014>
- 589 Gouin, T., Roche, N., Lohmann, R., Hodges, G., 2011. A thermodynamic approach for  
590 assessing the environmental exposure of chemicals absorbed to microplastic. *Environ.*  
591 *Sci. Technol.* 45, 1466–1472. <https://doi.org/10.1021/es1032025>
- 592 Granek, E.F., Brander, S.M., Holland, E.B., 2020. Microplastics in aquatic organisms:  
593 Improving understanding and identifying research directions for the next decade.  
594 *Limnol. Oceanogr. Lett.* 5, 1–4. <https://doi.org/10.1002/lol2.10145>
- 595 Hasegawa, T., Nakaoka, M., 2021. Trophic transfer of microplastics from mysids to fish  
596 greatly exceeds direct ingestion from the water column. *Environ. Pollut.* 273, 116468.  
597 <https://doi.org/10.1016/j.envpol.2021.116468>
- 598 Hermabessiere, L., Dehaut, A., Paul-Pont, I., Lacroix, C., Jezequel, R., Soudant, P., Duflos,  
599 G., 2017a. Occurrence and effects of plastic additives on marine environments and  
600 organisms: A review. *Chemosphere* 182, 781–793.  
601 <https://doi.org/10.1016/j.chemosphere.2017.05.096>



- 602 Hermabessiere, L., Dehaut, A., Paul-Pont, I., Lacroix, C., Jezequel, R., Soudant, P., Duflos,  
603 G., 2017b. Occurrence and effects of plastic additives on marine environments and  
604 organisms: A review. *Chemosphere* 182, 781–793.  
605 <https://doi.org/10.1016/j.chemosphere.2017.05.096>
- 606 Huang, W., Song, B., Liang, J., Niu, Q., Zeng, G., 2020. Microplastics and associated  
607 contaminants in the aquatic environment : A review on their ecotoxicological effects ,  
608 trophic transfer , and potential impacts to human health. *J. Hazard. Mater.* 124187.  
609 <https://doi.org/10.1016/j.jhazmat.2020.124187>
- 610 Khosrovyan, A., Marin, M.J.S., Peret, A.M., De Almeida, D.F., Angel DelValls, T., Riba,  
611 I., 2012. Weight-of-evidence-based assessment of sediment quality of the São Francisco  
612 River (Brazil) with the help of software tool SQA. *iEMSs 2012 - Manag. Resour. a Ltd.*  
613 *Planet Proc. 6th Bienn. Meet. Int. Environ. Model. Softw. Soc.* 2958–2965.
- 614 Kim, J.W., Chang, K.H., Isobe, T., Tanabe, S., 2011. Acute toxicity of benzotriazole  
615 ultraviolet stabilizers on freshwater crustacean (*Daphnia pulex*). *J. Toxicol. Sci.* 36,  
616 247–251. <https://doi.org/10.2131/jts.36.247>
- 617 Koelmans, A.A., Bakir, A., Burton, G.A., Janssen, C.R., 2016. Microplastic as a vector for  
618 chemicals in the aquatic environment: critical review and model-supported  
619 reinterpretation of empirical studies. <https://doi.org/10.1021/acs.est.5b06069>
- 620 Lenz, R., Enders, K., Nielsen, T.G., 2016. Microplastic exposure studies should be  
621 environmentally realistic. *Proc. Natl. Acad. Sci.* 113, E4121–E4122.  
622 <https://doi.org/10.1073/pnas.1606615113>
- 623 Mateos-Cárdenas, A., O'Halloran, J., van Pelt, F.N.A.M., Jansen, M.A.K., 2020. Rapid  
624 fragmentation of microplastics by the freshwater amphipod *Gammarus duebeni* (Lillj.).  
625 *Sci. Rep.* 10, 1–12. <https://doi.org/10.1038/s41598-020-69635-2>
- 626 Ministry of Agriculture, F. and F., 2016. Status of seafood consumption in Japan [WWW  
627 Document]. URL

- 628 [https://www.jfa.maff.go.jp/j/kikaku/wpaper/h29\\_h/trend/1/t1\\_2\\_4\\_2.html](https://www.jfa.maff.go.jp/j/kikaku/wpaper/h29_h/trend/1/t1_2_4_2.html)
- 629 Ministry of Health, L. and W., 2018. Average height and weight of Japanese by age and sex  
630 [WWW Document]. URL [https://www.mhlw.go.jp/toukei/youran/indexyk\\_2\\_1.html](https://www.mhlw.go.jp/toukei/youran/indexyk_2_1.html)  
631 (accessed 12.27.20)
- 632 Morohoshi, K., Yamamoto, H., Kamata, R., Shiraishi, F., Koda, T., Morita, M., 2005.  
633 Estrogenic activity of 37 components of commercial sunscreen lotions evaluated by in  
634 vitro assays. *Toxicol. Vitro.* 19, 457–469. <https://doi.org/10.1016/j.tiv.2005.01.004>
- 635 Nakata, H., Murata, S., Filatreau, J., 2009. Occurrence and concentrations of benzotriazole  
636 UV stabilizers in marine organisms and sediments from the Ariake Sea, Japan. *Environ.*  
637 *Sci. Technol.* 43, 6920–6926. <https://doi.org/10.1021/es900939j>
- 638 NITE, 2017. Risk assessment for chemical substances contained in products:  
639 Decabromodiphenyl ether 1–12.
- 640 NOAA, 2020. What are microplastics? [WWW Document]. URL  
641 <https://oceanservice.noaa.gov/facts/microplastics.html> (accessed 7.23.20).
- 642 Qiao, P., Gobas, F.A.P.C., Farrell, A.P., 2000. Relative contributions of aqueous and dietary  
643 uptake of hydrophobic chemicals to the body burden in juvenile rainbow trout. *Arch.*  
644 *Environ. Contam. Toxicol.* 39, 369–377. <https://doi.org/10.1007/s002440010117>
- 645 R Core Team, 2020. R: A Language and Environment for Statistical Computing.
- 646 Rani, M., Shim, W.J., Han, G.M., Jang, M., Al-Odaini, N.A., Song, Y.K., Hong, S.H., 2015.  
647 Qualitative Analysis of Additives in Plastic Marine Debris and Its New Products. *Arch.*  
648 *Environ. Contam. Toxicol.* 69, 352–366. <https://doi.org/10.1007/s00244-015-0224-x>
- 649 Rochman, C.M., Hoh, E., Kurobe, T., Teh, S.J., 2013. Ingested plastic transfers hazardous  
650 chemicals to fish and induces hepatic stress. *Sci. Rep.* 3, 1–7.  
651 <https://doi.org/10.1038/srep03263>
- 652 Rochman, C.M., Lewison, R.L., Eriksen, M., Allen, H., Cook, A.M., Teh, S.J., 2014.  
653 Polybrominated diphenyl ethers (PBDEs) in fish tissue may be an indicator of plastic

- 654 contamination in marine habitats. *Sci. Total Environ.* 476–477, 622–633.  
655 <https://doi.org/10.1016/j.scitotenv.2014.01.058>
- 656 Rummel, C.D., Löder, M.G.J., Fricke, N.F., Lang, T., Griebeler, E., Janke, M., Gerdt, G.,  
657 2016. Plastic ingestion by pelagic and demersal fish from the North Sea and Baltic Sea.  
658 *MPB* 102, 134–141. <https://doi.org/10.1016/j.marpolbul.2015.11.043>
- 659 Somo, D.A., Onukwufor, J.O., Wood, C.M., Richards, J.G., 2020. Interactive effects of  
660 temperature and hypoxia on diffusive water flux and oxygen uptake rate in the tidepool  
661 sculpin, *Oligocottus maculosus*. *Comp. Biochem. Physiol. -Part A Mol. Integr.*  
662 *Physiol.* 250. <https://doi.org/10.1016/j.cbpa.2020.110781>
- 663 Sun, B., Hu, Y., Cheng, H., Tao, S., 2019. Releases of brominated flame retardants (BFRs)  
664 from microplastics in aqueous medium: Kinetics and molecular-size dependence of  
665 diffusion. *Water Res.* 151, 215–225. <https://doi.org/10.1016/j.watres.2018.12.017>
- 666 Sun, Y., Wang, Y., Liang, B., Chen, T., Zheng, D., Zhao, X., Jing, L., Zhou, X., Sun, Z., Shi,  
667 Z., 2020. Hepatotoxicity of decabromodiphenyl ethane ( DBDPE ) and  
668 decabromodiphenyl ether ( BDE-209 ) in 28-day exposed Sprague- Dawley rats. *Sci.*  
669 *Total Environ.* 705, 135783. <https://doi.org/10.1016/j.scitotenv.2019.135783>
- 670 Tanaka, K., Takada, H., Yamashita, R., Mizukawa, K., Fukuwaka, M. aki, Watanuki, Y.,  
671 2013. Accumulation of plastic-derived chemicals in tissues of seabirds ingesting marine  
672 plastics. *Mar. Pollut. Bull.* 69, 219–222. <https://doi.org/10.1016/j.marpolbul.2012.12.010>
- 673 Tanaka, K., Takada, H., Yamashita, R., Mizukawa, K., Fukuwaka, M.A., Watanuki, Y., 2015.  
674 Facilitated leaching of additive-derived PBDEs from plastic by seabirds' stomach oil  
675 and accumulation in tissues. *Environ. Sci. Technol.* 49, 11799–11807.  
676 <https://doi.org/10.1021/acs.est.5b01376>
- 677 Tanaka, K., van Franeker, J.A., Deguchi, T., Takada, H., 2019. Piece-by-piece analysis of  
678 additives and manufacturing byproducts in plastics ingested by seabirds: Implication for  
679 risk of exposure to seabirds. *Mar. Pollut. Bull.* 145, 36–41.

- 680 <https://doi.org/10.1016/j.marpolbul.2019.05.028>
- 681 Tanaka, K., Watanuki, Y., Takada, H., Ishizuka, M., Yamashita, R., Kazama, M., Hiki, N.,  
682 Kashiwada, F., Mizukawa, K., Mizukawa, H., Hyrenbach, D., Hester, M., Ikenaka, Y.,  
683 Nakayama, S.M.M., 2020. *In vivo* accumulation of plastic-derived chemicals into  
684 seabird tissues. *Curr. Biol.* 30, 723-728.e3. <https://doi.org/10.1016/j.cub.2019.12.037>
- 685 Walkinshaw, C., Lindeque, P.K., Thompson, R., Tolhurst, T., Cole, M., 2020. Microplastics  
686 and seafood: lower trophic organisms at highest risk of contamination. *Ecotoxicol.*  
687 *Environ. Saf.* 190, 110066. <https://doi.org/10.1016/j.ecoenv.2019.110066>
- 688 Wang, W., Ge, J., Yu, X., 2020. Bioavailability and toxicity of microplastics to fish species:  
689 A review. *Ecotoxicol. Environ. Saf.* 189, 109913.  
690 <https://doi.org/10.1016/j.ecoenv.2019.109913>
- 691 Wang, X., Ling, S., Guan, K., Luo, X., Chen, L., Han, J., Zhang, W., Mai, B., Zhou, B., 2019.  
692 Bioconcentration, biotransformation, and thyroid endocrine disruption of  
693 decabromodiphenyl ethane (DBDPE), a novel brominated flame retardant, in zebrafish  
694 larvae. *Environ. Sci. Technol.* 53, 8437–8446. <https://doi.org/10.1021/acs.est.9b02831>
- 695 Wang, Y., Chen, T., Sun, Y., Zhao, X., Zheng, D., Jing, L., Zhou, X., Sun, Z., Shi, Z., 2019.  
696 A comparison of the thyroid disruption induced by decabrominated diphenyl ethers  
697 (BDE-209) and decabromodiphenyl ethane (DBDPE) in rats. *Ecotoxicol. Environ. Saf.*  
698 174, 224–235. <https://doi.org/10.1016/j.ecoenv.2019.02.080>
- 699 Wardrop, P., Shimeta, J., Nugegoda, D., Morrison, P.D., Miranda, A., Tang, M., Clarke,  
700 B.O., 2016. Chemical pollutants sorbed to ingested microbeads from personal care  
701 products accumulate in fish. *Environ. Sci. Technol.* 50, 4037–4044.  
702 <https://doi.org/10.1021/acs.est.5b06280>
- 703 Webb, N.A., Shaw, J.R., Morgan, J., Hogstrand, C., Wood, C.M., 2001. Acute and chronic  
704 physiological effects of silver exposure in three marine teleosts. *Aquat. Toxicol.* 54,  
705 161–178. [https://doi.org/10.1016/S0166-445X\(01\)00150-3](https://doi.org/10.1016/S0166-445X(01)00150-3)

- 706 Wright, S.L., Kelly, F.J., 2017. Plastic and human health: A micro issue? *Environ. Sci.*  
707 *Technol.* 51, 6634–6647. <https://doi.org/10.1021/acs.est.7b00423>
- 708 Wright, S.L., Thompson, R.C., Galloway, T.S., 2013. The physical impacts of microplastics  
709 on marine organisms: A review. *Environ. Pollut.*  
710 <https://doi.org/10.1016/j.envpol.2013.02.031>
- 711 Zhang, F., Wang, X., Xu, J., Zhu, L., Peng, G., Xu, P., Li, D., 2019. Food-web transfer of  
712 microplastics between wild caught fish and crustaceans in East China Sea. *Mar. Pollut.*  
713 *Bull.* 146, 173–182. <https://doi.org/10.1016/j.marpolbul.2019.05.061>
- 714 Ziccardi, L.M., Edgington, A., Hentz, K., Kulacki, K.J., Kane Driscoll, S., 2016.  
715 Microplastics as vectors for bioaccumulation of hydrophobic organic chemicals in the  
716 marine environment: A state-of-the-science review. *Environ. Toxicol. Chem.*  
717 <https://doi.org/10.1002/etc.3461>  
718  
719

720 **Tables**

721 **Table 1** Profile of additives compounded in the plastics used for the experiment. Octanol-water  
722 partition coefficient ( $K_{ow}$ ) is represented as a hydrophobicity parameter of each chemical.

---

| <b>Compounds</b> | <b>Concentration<br/>(<math>\mu\text{g/g-plastic}</math>)</b> | <b>Molecular weight<br/>(g/mol)</b> | <b><math>\log K_{ow}</math></b> |
|------------------|---------------------------------------------------------------|-------------------------------------|---------------------------------|
| BDE209           | 357                                                           | 959                                 | 12.1                            |
| DBDPE            | 74.2                                                          | 971                                 | 13.6                            |
| UV-234           | 361                                                           | 448                                 | 7.67                            |
| UV-327           | 397                                                           | 358                                 | 6.91                            |
| BP-12            | 123                                                           | 326                                 | 6.96                            |

---

723

724 **Table 2** Result of the leaching experiment with 2 mg of microplastics exposed to 1-L seawater  
725 for 24 h. SE represents standard error. Grey colored cells represent values under the limit of  
726 quantifications (LOQ). All DBDPE values are technically lower than LOQ because the blank  
727 value was very high.

| Additive | Blank | Initial amount   |       | Final amount     |      | Leaching rate |       |
|----------|-------|------------------|-------|------------------|------|---------------|-------|
|          |       | in plastics (ng) |       | in seawater (ng) |      | (%)           |       |
|          |       | Mean             | SE    | Mean             | SE   | Mean          | SE    |
| BDE 209  | 0.127 | 713              | 60951 | 6.27             | 5.27 | 0.86%         | 0.72% |
| DBDPE    | 60.0  | 148              | 21930 | 4.13             | 3.53 | 2.61%         | 2.20% |
| UV 327   | 0.208 | 722              | 66262 | 5.12             | 1.34 | 0.70%         | 0.18% |
| UV 234   | 0.327 | 794              | 9662  | 23.2             | 5.94 | 2.83%         | 0.71% |
| BP 12    | 4.83  | 246              | 12082 | 23.8             | 3.14 | 8.79%         | 1.07% |

728

729

730 **Table 3** Results of likelihood ratio test on the generalized linear model for the concentrations  
731 of additives in mysid as functions of treatment (ambient control, leachate treatment, and  
732 microplastic treatment).

| <b>Additive</b> | <b>Fixed factor</b> | <b>LR Chisq</b> | <b>df</b> | <b><i>p</i>-value</b> |
|-----------------|---------------------|-----------------|-----------|-----------------------|
| BDE209          | Treatment           | 253             | 2         | < 0.001               |
| DBDPE           | Treatment           | 186             | 2         | < 0.001               |
| UV234           | Treatment           | 134             | 2         | < 0.001               |
| UV327           | Treatment           | 280             | 2         | < 0.001               |
| BP12            | Treatment           | 10.8            | 2         | 0.004                 |

733

734



735 **Table 4** Results of likelihood ratio test on the generalized linear model for the concentrations  
736 of additives in fish muscle and liver as functions of treatment (ambient control, water treatment,  
737 and mysid treatment).

| <b>Body tissue</b>    | <b>Additive</b> | <b>Fixed factor</b> | <b>LR Chisq</b> | <b>df</b> | <b><i>p</i>-value</b> |
|-----------------------|-----------------|---------------------|-----------------|-----------|-----------------------|
| Muscle (Dry weight)   | BDE209          | Treatment           | 27.9            | 2         | < 0.001               |
|                       | DBDPE           | Treatment           | 27.2            | 2         | < 0.001               |
|                       | UV234           | Treatment           | 0.441           | 2         | 0.802                 |
|                       | UV327           | Treatment           | 9.72            | 2         | 0.00775               |
|                       | BP12            | Treatment           | 99.5            | 2         | < 0.001               |
| Muscle (Lipid weight) | BDE209          | Treatment           | 38.2            | 2         | < 0.001               |
|                       | DBDPE           | Treatment           | 36.4            | 2         | < 0.001               |
|                       | UV234           | Treatment           | 5.15            | 2         | 0.0763                |
|                       | UV327           | Treatment           | 17.6            | 2         | < 0.001               |
|                       | BP12            | Treatment           | 91.0            | 2         | < 0.001               |
| Liver (Dry weight)    | BDE209          | Treatment           | 18.5            | 2         | < 0.001               |
|                       | DBDPE           | Treatment           | 11.9            | 2         | 0.00257               |
|                       | UV234           | Treatment           | 33.4            | 2         | < 0.001               |
|                       | UV327           | Treatment           | 40.4            | 2         | < 0.001               |
|                       | BP12            | Treatment           | 7.01            | 2         | 0.0301                |

738

739

740 **Figures**

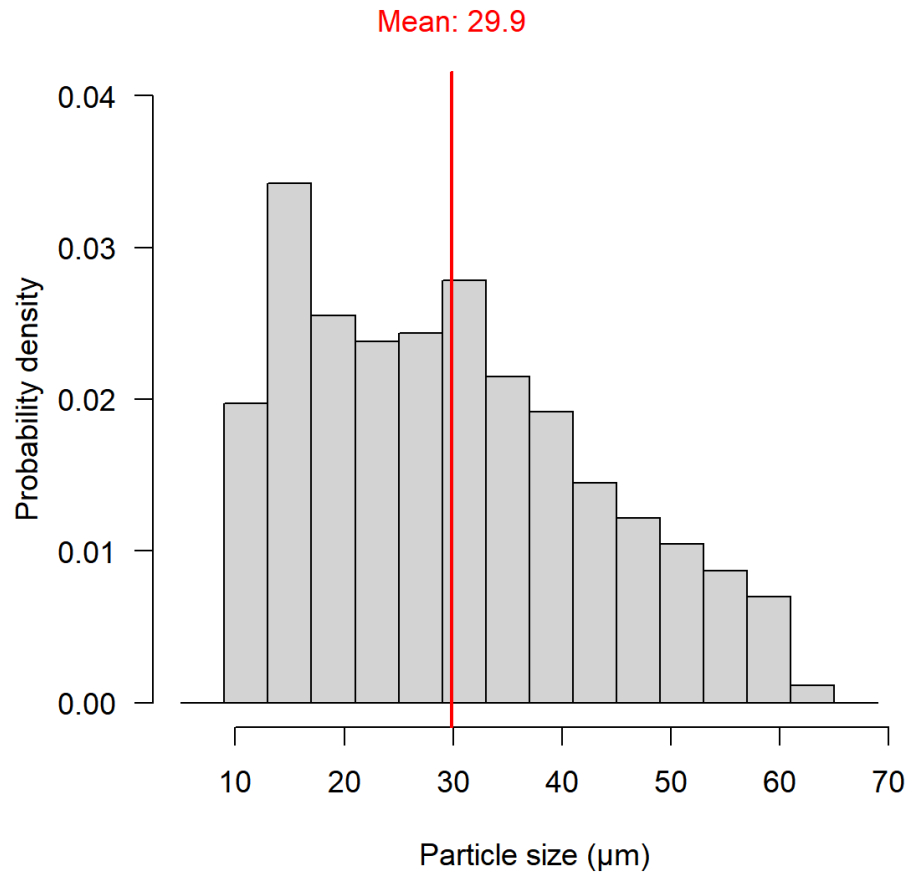

741

742 **Fig. 1.** Size distribution of polyethylene microplastics used for the experiment. Red line  
743 denotes the mean particle size.

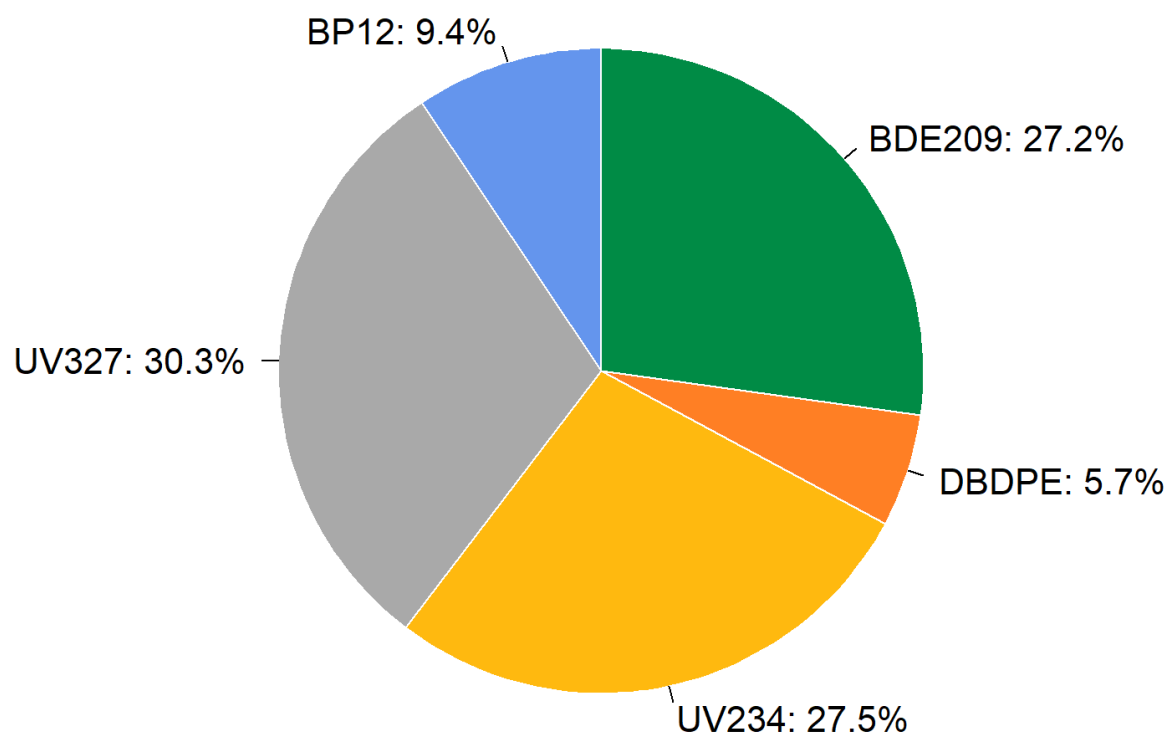

744

745 **Fig. 2.** Composition of additives in polyethylene microplastics used for the experiment.

746

747

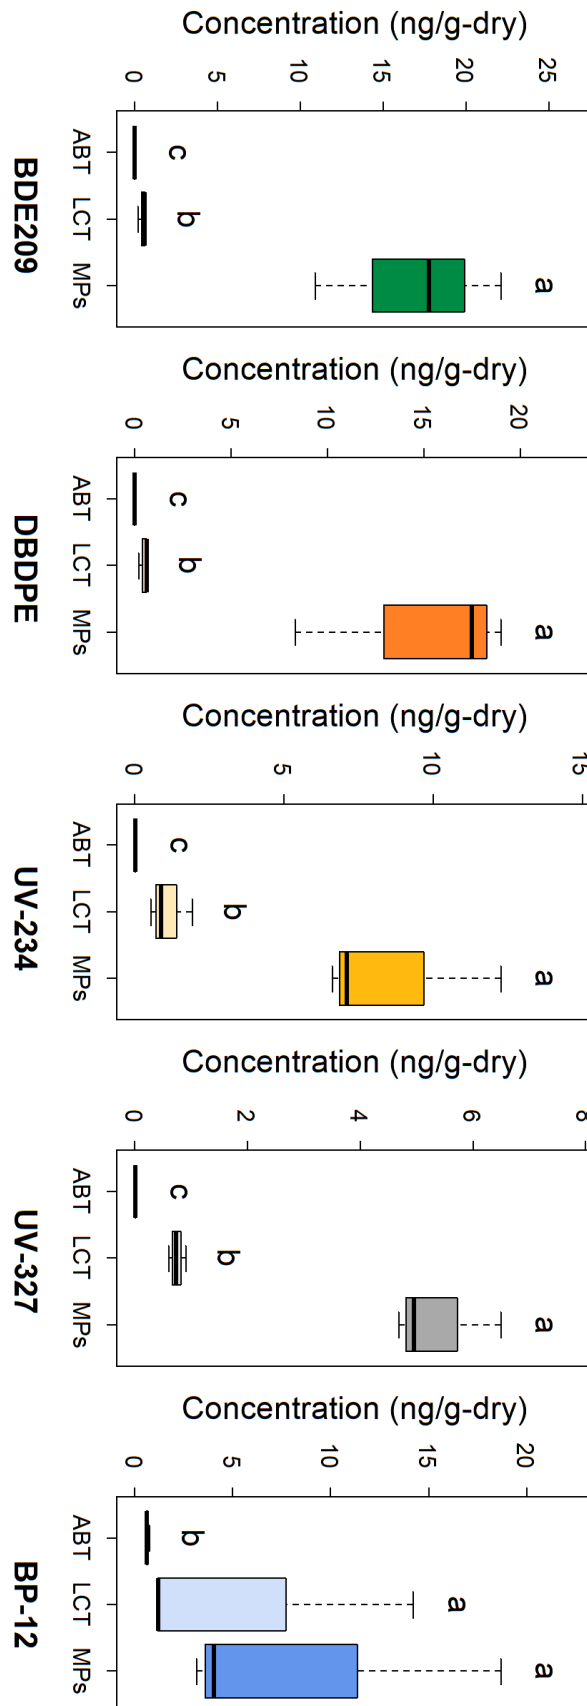

748 **Fig. 3** Concentration of the five additives in mysids per individual, collected from the ambient  
749 environment (ABT), treated with the leachate seawater (LCT), and exposed to microplastics  
750 (MPs). Results are shown as box and whisker plots with median (solid horizontal line),  
751 interquartile range (25th and 75th percentiles; box), and the 10th and 90th percentiles  
752 (whiskers). Different letters denote significant differences by post-hoc comparison ( $p < 0.05$   
753 GLM with post-hoc Tukey's HSD).

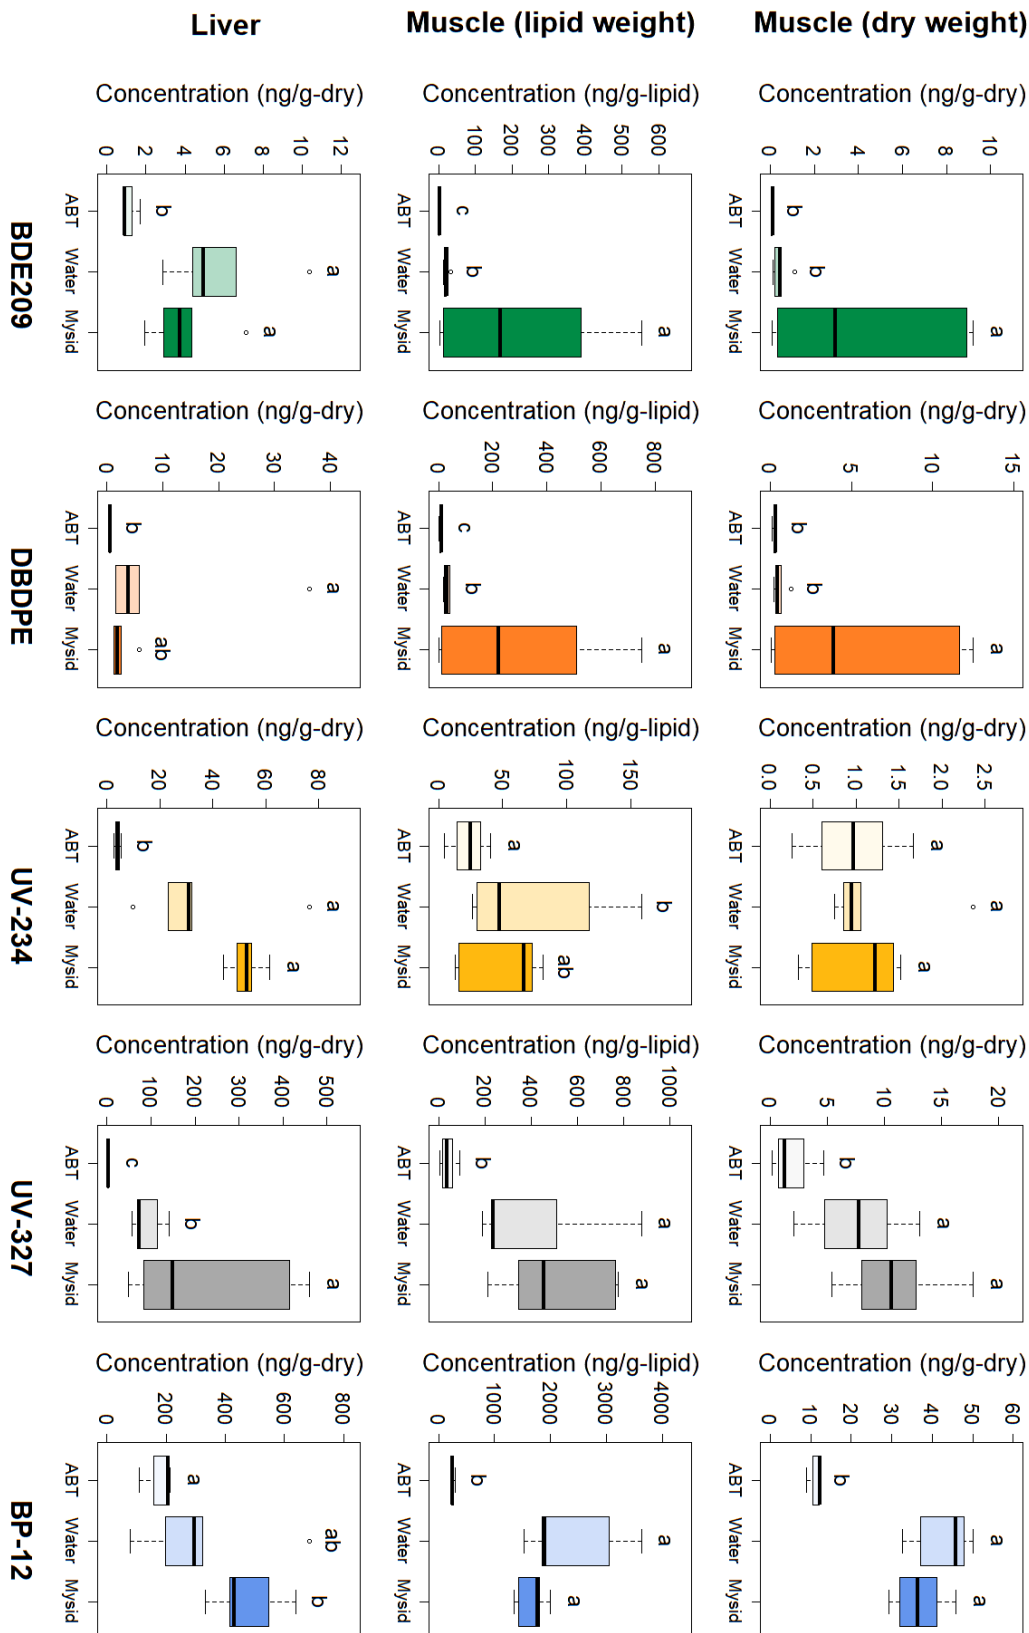

754

755

756 **Fig. 4.** Concentration of the five additives in fish body and liver, collected from the ambient  
757 environment (ABT), exposed to microplastics suspended in the water column (Water), and fed  
758 plastic-exposed mysid (Mysid). Both dry weight and lipid weight base concentrations are  
759 shown for body, but only the dry weight base concentration is shown for liver because the  
760 available sample volume was limited. Results are shown as box and whisker plots with median  
761 (solid horizontal line), interquartile range (25th and 75th percentiles; box), and the 10th and  
762 90th percentiles (whiskers). Different letters denote significant differences by post-hoc  
763 comparison ( $p < 0.05$  GLM with post-hoc Tukey's HSD).  
764
